# Supplementary material for: Synthesis of carbon quantum dots from cabbage with down- and up-conversion photoluminescence properties: excellent imaging agent for biomedical applications
Source: Royal Society of Chemistry journal article supplement (doi:10.1039/c5gc00686d), 2015-01-01
Supplement: c5gc00686d1.pdf [file c5gc00686d1.pdf]

## Electronic Supplementary Information (ESI)

### **Synthesis of Carbon Quantum Dot from Cabbage with Down- and Up-Conversion Photoluminescence Properties: Excellent Imaging Agent for Biomedical Application**

Al-Mahmnur Alam<sup>a</sup>, Byung-Yong Park<sup>b,\*\*</sup>, Zafar Khan Ghouri<sup>a</sup>, Mira Park<sup>c</sup>, Hak-Yong Kim<sup>a,c,\*</sup>

<sup>a</sup>Department of BIN fusion Technology, Chonbuk National University, Jeonju 561-756, South Korea.

<sup>b</sup>Department of Veterinary Anatomy, College of Veterinary Medicine and Bio-safety Research Institute, Chonbuk National University, Jeonju, 561-756, South Korea.

<sup>c</sup>Department of Organic Materials and Fiber Engineering, Chonbuk National University, Jeonju 561-756, South Korea.

---

**\*\*Corresponding Author:** Tel: +82-63-270-2351, Fax: +82-63-270-4249

E-mail Address: khy@jbnu.ac.kr

**\*Co-corresponding Author:** parkb@jbnu.ac.kr

## 1. Cytotoxicity experiment

HaCaT cells were seeded in 96 different well plates containing 200  $\mu$ l/well (3,000 cells/well). The medium of cultured cells was replaced after 3h with a fresh medium. The cultured cells were then treated (triplicate wells per condition) by adding 100 $\mu$ l of 1000, 700, 500, 300, 100 and 20  $\mu$ g/ml of the CQD in Defined K-SFM medium. Simultaneously, the Defined K-SFM medium alone was added to another set of cells as the solvent control (Defined K-SFM). The cells were then incubated for another 24 h prior to the addition of 20  $\mu$ l of 2.5 mg/ml MTT solution into each well. The incubation was continued for 1 h before the medium was removed. DMSO (100  $\mu$ l) was added to each well and mixed to ensure dissolving of the crystal formazan before the absorbance at 570 nm was measured. The viability experiments were done in triplicates and each data point represents the average of at least 3 independent experiments. The distributions of the data are abnormal. The data were analysed using Statistical Analysis System (SAS) and expressed as mean  $\pm$  SD. One way analysis of variance technique was applied to observe the significance between the groups. Entire statistical analysis was carried out at  $p < 0.05$ .

**Table S1. Comparison of percentage of Yield of CQD from cabbage and other natural sources.**

| <b>Source</b>  | <b>Amount of Raw materials</b> | <b>Obtained CQD</b> | <b>Yield ( %)</b> | <b>References</b> |
|----------------|--------------------------------|---------------------|-------------------|-------------------|
| Orange Juice   | 40 mL Juice                    | 400 mg              | -----             | 6                 |
| Orange peel    | 2 g                            | 246 mg              | 12.3              | 7                 |
| Strawberry     | 35 mL Juice                    | Not specified       | -----             | 11                |
| Soybean ground | 1 g                            | 10 mg               | 1                 | 12                |
| Cocon Silk     | 1g                             | Not specified       | -----             | 13                |
| Food waste     | 100 Kg                         | 120 g               | 0.12              | 17                |
| Tomato         | 4 g                            | 500 mg              | 12.5              | 30                |
| <b>Cabbage</b> | <b>5 g</b>                     | <b>353.8 mg</b>     | <b>7.07</b>       | <b>This work</b>  |

## 2. Quantum Yield of cabbage derived CQD:

Quinine sulfate in 0.1 M H<sub>2</sub>SO<sub>4</sub> (literature quantum yield 0.54 at 360 nm) was preferred as a standard. The quantum yield of CQDs in water was calculated according to the following equation:

$$\phi_x = \phi_{std} [I_x/A_x] [A_{std}/I_{std}] [\eta_x/\eta_{std}]^2$$

Where  $\phi$  is the quantum yield,  $I$  is the measured integrated emission intensity,  $\eta$  is the refractive index, and  $A$  is the optical density. The subscript “*std*” refers to the parameters of standard quinine sulfate. In order to minimize re-absorption effects, absorption in the 10 mm fluorescence cuvette was kept below 0.10 at the excitation wavelength (360 nm). The sample of CQD and quinine sulfate which absorption intensity was recorded below 0.10 (Fig.S1a), was excited at 360 nm to record their emission spectra at 428 nm and 450 nm respectively (Fig.S1b).

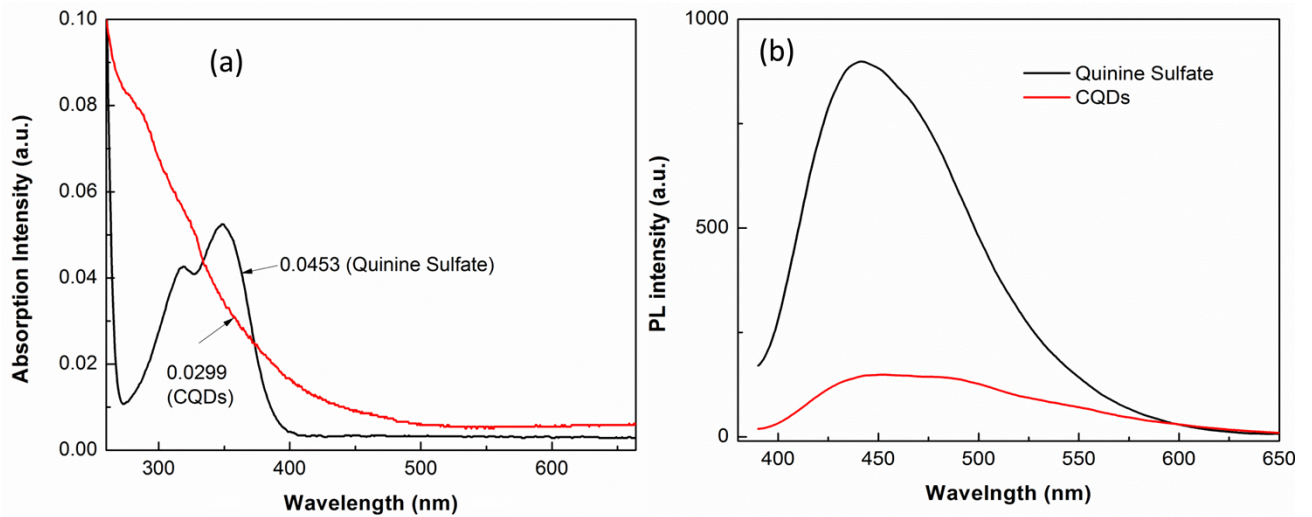

Fig.S1. Absorption and emission spectra of CQDs and quinine sulfate

The measured integrated emission intensity, optical density and refractive index from literature was placed in the Table.S2 to calculate the quantum yield of CQD.

**Table S2. Required experimental data for quantum yield calculation of CQD**

| $\varphi_{std}$ | $I_{std}$ | $I_x$  | $A_x$  | $A_{std}$ | $\eta_x$   | $\eta_{std}$ | Calculated         |
|-----------------|-----------|--------|--------|-----------|------------|--------------|--------------------|
|                 |           |        |        |           | ( $H_2O$ ) | ( $H_2O$ )   | QY ( $\varphi_x$ ) |
| 0.54            | 18205     | 0.0299 | 0.0453 | 90008.73  | 1.33       | 1.33         | 0.1654             |

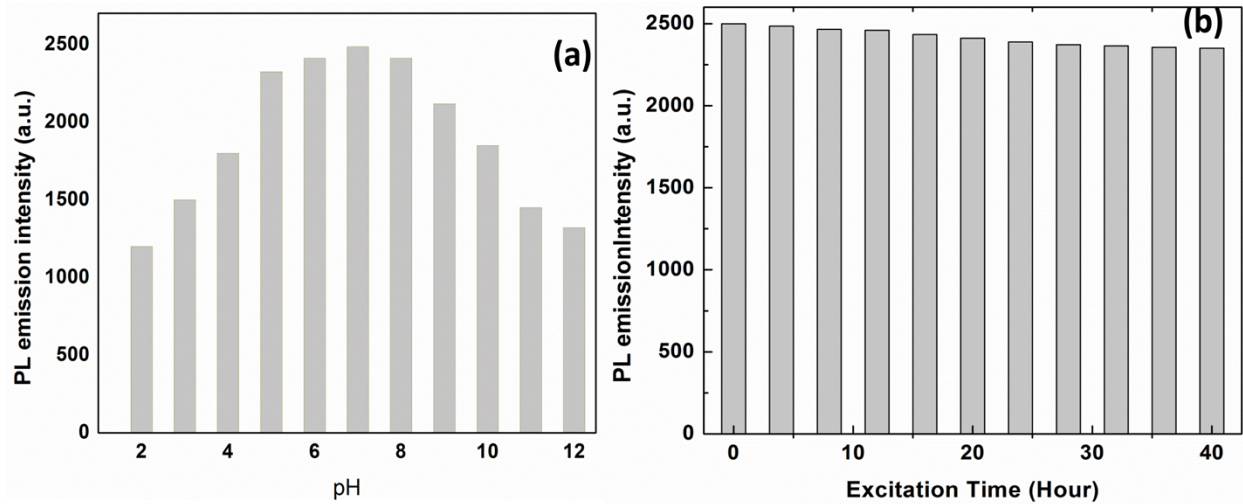

Fig.S2. pH sensitivity of CQDs (a) and UV irradiation effect on PL of CQDs over 40 hours (b)

**Table S3. Comparison of Cytotoxicity of CQD from cabbage and other sources for cell imaging in biomedical application.**

| <b>Imaging agent</b>      | <b>Tolerable range (cell viability)</b> | <b>Administered Dose(<math>\mu\text{g/ml}</math>)</b> | <b>Cell Type</b> | <b>Incubation Time</b> | <b>References</b> |
|---------------------------|-----------------------------------------|-------------------------------------------------------|------------------|------------------------|-------------------|
| Carbon<br>Quantum<br>dots | 100-1500 ( $>90\%$ )                    | 200                                                   | NIH3T3           | 24                     | 12                |
|                           | 5-80( $>90\%$ )                         | 40                                                    | Hela             | 24                     | 13                |
|                           | 25-400 ( $>90\%$ )                      | 400                                                   | HeLa             | 4                      | 14                |
|                           | 20-320( $>90\%$ )                       | 300                                                   | NIH-3T3          | 4                      | 16                |
|                           | 200-2000( $>90\%$ )                     | 500 and 1000                                          | HepG2            | 24                     | 17                |
|                           | 5-100 ( $<90\%$ )                       | 75                                                    | HeLa             | 24                     | 18                |
|                           | <b>20-500 (<math>&gt;90\%</math>)</b>   | <b>500</b>                                            | <b>HaCaT</b>     | <b>24</b>              | <b>This work</b>  |
